# Supplementary material for: A structural analysis of {M4O4} cubanes where M = Mn and Fe
Source: Royal Society of Chemistry journal article supplement (doi:10.1039/b715378c), 2007-12-04
Supplement: b715378c.pdf [file b715378c.pdf]

## **Structural analysis of $\{M_4O_4\}$ cubanes where $M = Mn$ and $Fe$**

**Alan F. Williams<sup>1</sup>**

---

<sup>1</sup> <sup>a</sup>Department of Inorganic Chemistry, University of Geneva, 30 quai Ernest Ansermet, CH 1211 Geneva 4, Switzerland. Fax: 0041 22 3796830; Tel: 0041 22 3796425; E-mail: Alan.Williams@chiam.unige.ch

Table S1. Geometric parameters for manganese(I) cubanes

| Code       | Mn-Mn (Å) | s.d.  | distortion | Mn-O (Å) | Tet.par. | Mn-O-Mn (°) | O-O (Å) | Ligand coding                                     | Ref.         |
|------------|-----------|-------|------------|----------|----------|-------------|---------|---------------------------------------------------|--------------|
| FLOHMN     | 3.199     | 0.000 |            | 2.053    | 0.791    | 102.37      | 2.529   | Mn <sub>4</sub> /Os <sub>4</sub> /m <sub>12</sub> | <sup>1</sup> |
| FLOHMN01   | 3.197     | 0.000 |            | 2.052    | 0.791    | 102.35      | 2.529   | Mn <sub>4</sub> /Os <sub>4</sub> /m <sub>12</sub> | <sup>2</sup> |
| KUSGEK     | 3.159     | 0.006 | L, S4-     | 2.033    | 0.798    | 101.95      | 2.519   | Mn <sub>4</sub> /Os <sub>4</sub> /m <sub>12</sub> | <sup>3</sup> |
| KUSGEK10   | 3.159     | 0.006 | L, S4-     | 2.033    | 0.798    | 101.95      | 2.519   | Mn <sub>4</sub> /Os <sub>4</sub> /m <sub>12</sub> | <sup>2</sup> |
| PEGGUD     | 3.156     | 0.009 | L, C3+     | 2.037    | 0.804    | 101.57      | 2.538   | Mn <sub>4</sub> /Os <sub>4</sub> /m <sub>12</sub> | <sup>4</sup> |
| PEGHAK     | 3.178     | 0.004 | L          | 2.046    | 0.798    | 101.92      | 2.537   | Mn <sub>4</sub> /Os <sub>4</sub> /m <sub>12</sub> | <sup>4</sup> |
| PEHKIW     | 3.165     | 0.014 | L, S4-     | 2.040    | 0.797    | 101.97      | 2.524   | Mn <sub>4</sub> /Os <sub>4</sub> /m <sub>12</sub> | <sup>5</sup> |
| PEHKIW10   | 3.165     | 0.014 | L, S4-     | 2.039    | 0.797    | 101.97      | 2.524   | Mn <sub>4</sub> /Os <sub>4</sub> /m <sub>12</sub> | <sup>2</sup> |
| TITXID     | 3.172     | 0.016 | L          | 2.051    | 0.796    | 102.08      | 2.524   | Mn <sub>4</sub> /Os <sub>4</sub> /m <sub>12</sub> | <sup>6</sup> |
| TITXOJ     | 3.173     | 0.012 | L          | 2.052    | 0.793    | 102.21      | 2.517   | Mn <sub>4</sub> /Os <sub>4</sub> /m <sub>12</sub> | <sup>6</sup> |
| VOKFIK     | 3.194     | 0.002 |            | 2.058    | 0.791    | 102.33      | 2.528   | Mn <sub>4</sub> /Os <sub>4</sub> /m <sub>12</sub> | <sup>7</sup> |
| VOKFIK10   | 3.193     | 0.002 |            | 2.047    | 0.794    | 102.17      | 2.535   | Mn <sub>4</sub> /Os <sub>4</sub> /m <sub>12</sub> | <sup>2</sup> |
| ZEBFER     | 3.201     | 0.006 | L, S4+     | 2.058    | 0.794    | 102.14      | 2.543   | Mn <sub>4</sub> /Os <sub>4</sub> /m <sub>12</sub> | <sup>2</sup> |
| ZEBFIV     | 3.196     | 0.001 |            | 2.056    | 0.787    | 102.61      | 2.515   | Mn <sub>4</sub> /Os <sub>4</sub> /m <sub>12</sub> | <sup>2</sup> |
| ZEBFOB     | 3.201     | 0.003 | L, S4-     | 2.053    | 0.795    | 102.13      | 2.544   | Mn <sub>4</sub> /Os <sub>4</sub> /m <sub>12</sub> | <sup>2</sup> |
| ZEBFUH     | 3.200     | 0.005 | L          | 2.042    | 0.794    | 102.20      | 2.540   | Mn <sub>4</sub> /Os <sub>4</sub> /m <sub>12</sub> | <sup>2</sup> |
| ZEBFUH     | 3.197     | 0.006 | L, C3-     | 2.036    | 0.793    | 102.21      | 2.536   | Mn <sub>4</sub> /Os <sub>4</sub> /m <sub>12</sub> | <sup>2</sup> |
| ZEBGAO     | 3.166     | 0.010 | L          | 2.048    | 0.802    | 101.67      | 2.541   | Mn <sub>4</sub> /Os <sub>4</sub> /m <sub>12</sub> | <sup>2</sup> |
| ZEBGES     | 3.158     | 0.005 | L, S4-     | 2.039    | 0.801    | 101.74      | 2.531   | Mn <sub>4</sub> /Os <sub>4</sub> /m <sub>12</sub> | <sup>2</sup> |
| ZEBGOC     | 3.178     | 0.023 | L, S4+     | 2.060    | 0.800    | 101.80      | 2.543   | Mn <sub>4</sub> /Os <sub>4</sub> /m <sub>12</sub> | <sup>2</sup> |
| ZEBHAP     | 3.156     | 0.017 | L, S4-     | 2.047    | 0.807    | 101.40      | 2.546   | Mn <sub>4</sub> /Os <sub>4</sub> /m <sub>12</sub> | <sup>2</sup> |
| ZIZHIZ     | 3.205     | 0.001 | 0          | 2.083    | 0.795    | 102.10      | 2.548   | Mn <sub>4</sub> /Os <sub>4</sub> /m <sub>12</sub> | <sup>8</sup> |
| Mean value | 3.180     |       |            | 2.048    | 0.796    | 102.04      | 2.532   |                                                   |              |
| s.d        | 0.018     |       |            | 0.009    | 0.005    | 0.28        | 0.010   |                                                   |              |

Legend for tables:

Mn-Mn (Å): average Mn-Mn distance for the structure

s.d. : standard deviation of the Mn-Mn distances

distortion : classified as low (L), medium (M) or high (H) as s.d. < 0.030, 0.30 < s.d. < 0.100 , s.d. > 0.100, symmetry of the distortion, + elongation, - compression.

Mn-O (Å) : average Mn-O distance for the structure

Tet.par. : Tetrahedral parameter = O-O / Mn-Mn

Mn-O-Mn (°) : average Mn-O-Mn angle for the structure

O-O (Å) : average O-O distance for the structure

Ligand coding : metal/ $\mu_3$ -bridging ligand/terminal ligand. Mn<sub>4</sub>/Os<sub>4</sub>/m<sub>12</sub> implies four manganese, four unsupported  $\mu_3$ -bridging ligands, and twelve monodentate terminal ligands.

Macro: macrocyclic ligand

Ref. : Literature reference

Table S2. Geometric parameters for manganese(II) cubanes

| Code                | Mn-Mn (Å) | s.d.  | distortion | Mn-O (Å) | Tet.par. | Mn-O-Mn (°) | O-O (Å) | Ligand coding                                                   | Ref.          |
|---------------------|-----------|-------|------------|----------|----------|-------------|---------|-----------------------------------------------------------------|---------------|
| CEHVOB              | 3.314     | 0.029 | L,S4-      | 2.198    | 0.866    | 97.85       | 2.871   | Mn <sub>4</sub> /3s <sub>4</sub> /                              | <sup>9</sup>  |
| CUGKUK              | 3.361     | 0.064 | M, S4-     | 2.204    | 0.840    | 99.41       | 2.823   | macro                                                           | <sup>10</sup> |
| FUBMIY              | 3.370     | 0.059 | M, S4-     | 2.206    | 0.836    | 99.61       | 2.819   | macro                                                           | <sup>11</sup> |
| LEFXEZ <sup>a</sup> | 3.231     | 0.076 | M, S4-     | 2.167    | 0.888    | 96.41       | 2.870   | Mn <sub>4</sub> /0s <sub>4</sub> /m <sub>2</sub> b <sub>4</sub> | <sup>12</sup> |
| MAWZIT              | 3.373     | 0.043 | M          | 2.206    | 0.836    | 99.69       | 2.818   | Mn <sub>4</sub> /2s <sub>4</sub> /m <sub>4</sub>                | <sup>13</sup> |
| MOFSAB              | 3.371     | 0.032 | M, S4-     | 2.211    | 0.842    | 99.32       | 2.838   | Mn <sub>4</sub> /2s <sub>4</sub> /m <sub>4</sub>                | <sup>14</sup> |
| OCIJAM              | 3.320     | 0.113 | H,C3+      | 2.172    | 0.861    | 97.15       | 2.859   |                                                                 | <sup>15</sup> |
| TAVNUZ              | 3.258     | 0.040 | M, S4-     | 2.175    | 0.877    | 97.38       | 2.855   | Mn <sub>4</sub> /0s <sub>4</sub> /m <sub>4</sub> b <sub>4</sub> | <sup>16</sup> |
| TAVPAH              | 3.267     | 0.046 | M, S4-     | 2.201    | 0.847    | 100.36      | 2.767   | Mn <sub>4</sub> /0s <sub>4</sub> /m <sub>4</sub> b <sub>4</sub> | <sup>16</sup> |
| TEZPUJ              | 3.379     | 0.166 | H,S4+      | 2.198    | 0.817    | 100.43      | 2.761   | macro                                                           | <sup>17</sup> |
| TEZQAQ              | 3.375     | 0.154 | H,S4+      | 2.189    | 0.847    | 97.61       | 2.858   | macro                                                           | <sup>17</sup> |
| VAFBIO              | 3.293     | 0.089 | M, S4-     | 2.216    | 0.860    | 99.58       | 2.831   | Mn <sub>4</sub> /1s <sub>2</sub> /m <sub>4</sub>                | <sup>18</sup> |
| YAQXUK              | 3.384     | 0.076 | M          | 2.195    | 0.836    | 98.74       | 2.831   | Mn <sub>4</sub> /2s <sub>4</sub> /m <sub>4</sub>                | <sup>19</sup> |
| mean                | 3.330     |       |            | 2.195    | 0.850    | 98.735      | 2.831   |                                                                 |               |
|                     | 0.053     |       |            | 0.015    | 0.019    | 1.307       | 0.035   |                                                                 |               |

Table S3. Geometric parameters for manganese(III) and mixed valence cubanes

| Code     | O.N.    | Mn-Mn<br>(Å) | s.d.  | distortion | Mn-O<br>(Å) | Tet.par. | Mn-O-Mn<br>(°) | O-O (Å) | Ligand coding                                                   | Ref. |
|----------|---------|--------------|-------|------------|-------------|----------|----------------|---------|-----------------------------------------------------------------|------|
| VOKFUW   | Mn1.25  | 3.228        | 0.030 | L, C3+     | 2.083       | 0.804    | 97.6           | 2.595   | Mn <sub>4</sub> /Os <sub>4</sub> /m <sub>12</sub>               | 7    |
| MABHIH   | Mn2.5   | 3.199        | 0.191 | H, C2      | 2.128       | 0.871    | 97.6           | 2.787   |                                                                 | 20   |
| TEDPEX   | Mn2.5   | 3.150        | 0.229 | H, C2      | 2.113       | 0.883    | 96.7           | 2.782   | Mn <sub>4</sub> /2s <sub>2</sub> <sub>4</sub> /d <sub>2</sub>   | 21   |
| mean     |         | 3.174        |       |            | 2.120       | 0.877    | 97.140         | 2.784   |                                                                 |      |
| LAHXEY   | Mn(III) | 3.070        | 0.167 | H, C2      | 2.044       | 0.864    | 98.1           | 2.652   | Mn <sub>4</sub> /Os <sub>4</sub> /m <sub>2</sub> d <sub>5</sub> | 22   |
| MOTFIK   | Mn(III) | 3.026        | 0.168 | H, C2      | 2.039       | 0.882    | 97.0           | 2.670   |                                                                 | 23   |
| mean     |         | 3.048        |       |            | 2.042       | 0.873    | 97.549         | 2.661   |                                                                 |      |
| UFAMAP   | Mn3.25  | 3.008        | 0.243 | H, C3-     | 2.013       | 0.875    | 97.6           | 2.633   | Mn <sub>4</sub> /Os <sub>4</sub> /b <sub>3</sub> d <sub>3</sub> | 24   |
| VALROP   | Mn3.25  | 2.965        | 0.183 | H, C3-     | 1.979       | 0.876    | 96.2           | 2.597   | Mn <sub>4</sub> /Os <sub>4</sub> /b <sub>3</sub> d <sub>3</sub> | 25   |
| VALRUV   | Mn3.25  | 2.956        | 0.183 | H, C3-     | 1.984       | 0.887    | 96.2           | 2.623   | Mn <sub>4</sub> /Os <sub>4</sub> /b <sub>3</sub> d <sub>3</sub> | 25   |
| ZALSUA   | Mn3.25  | 3.000        | 0.221 | H, C3-     | 2.008       | 0.878    | 96.1           | 2.634   | Mn <sub>4</sub> /Os <sub>4</sub> /b <sub>3</sub> d <sub>3</sub> | 26   |
| ZALSUA01 | Mn3.25  | 3.000        | 0.221 | H, C3-     | 2.008       | 0.878    | 97.4           | 2.634   | Mn <sub>4</sub> /Os <sub>4</sub> /b <sub>3</sub> d <sub>3</sub> | 27   |
| mean     |         | 2.986        |       |            | 1.998       | 0.879    | 96.7           | 2.624   |                                                                 |      |
| LAHXIC   | Mn3.5   | 2.920        | 0.056 | M, C2      | 1.943       | 0.874    | 97.4           | 2.551   | Mn <sub>4</sub> /Os <sub>4</sub> /d <sub>6</sub>                | 22   |
| LAHXIC   | Mn3.5   | 2.921        | 0.034 | M, C2      | 1.947       | 0.877    | 97.2           | 2.563   | Mn <sub>4</sub> /Os <sub>4</sub> /d <sub>6</sub>                | 22   |
| LAHXOI   | Mn3.5   | 2.911        | 0.095 | M, C2      | 1.945       | 0.882    | 96.9           | 2.569   | Mn <sub>4</sub> /Os <sub>4</sub> /d <sub>6</sub>                | 22   |
| NAYSUB   | Mn3.5   | 2.930        | 0.019 | L, C3-     | 1.953       | 0.876    | 97.3           | 2.567   | Mn <sub>4</sub> /Os <sub>4</sub> /d <sub>6</sub>                | 28   |
| NAYSUB   | Mn3.5   | 2.923        | 0.003 | L, C3-     | 1.948       | 0.877    | 97.2           | 2.563   | Mn <sub>4</sub> /Os <sub>4</sub> /d <sub>6</sub>                | 28   |
| NAYSUB   | Mn3.5   | 2.931        | 0.028 | L, C3+     | 1.948       | 0.872    | 97.5           | 2.554   | Mn <sub>4</sub> /Os <sub>4</sub> /d <sub>6</sub>                | 28   |
| NAYSUB   | Mn3.5   | 2.923        | 0.022 | L, C3-     | 1.947       | 0.875    | 97.3           | 2.558   | Mn <sub>4</sub> /Os <sub>4</sub> /d <sub>6</sub>                | 28   |
| NAYSUB01 | Mn3.5   | 2.928        | 0.021 | L, C3-     | 1.935       | 0.858    | 98.3           | 2.513   | Mn <sub>4</sub> /Os <sub>4</sub> /d <sub>6</sub>                | 29   |
| NAYSUB01 | Mn3.5   | 2.937        | 0.054 | M, C3-     | 1.948       | 0.866    | 97.8           | 2.544   | Mn <sub>4</sub> /Os <sub>4</sub> /d <sub>6</sub>                | 29   |
| NAYSUB01 | Mn3.5   | 2.922        | 0.052 | M, C3+     | 1.939       | 0.867    | 97.8           | 2.534   | Mn <sub>4</sub> /Os <sub>4</sub> /d <sub>6</sub>                | 29   |
| NAYSUB01 | Mn3.5   | 2.927        | 0.047 | M, C3-     | 1.958       | 0.885    | 96.7           | 2.590   | Mn <sub>4</sub> /Os <sub>4</sub> /d <sub>6</sub>                | 29   |
| mean     |         | 2.922        |       |            | 1.946       | 0.874    | 97.4           | 2.555   |                                                                 |      |
| HIRDIV   | Mn3.75  | 2.888        | 0.057 | M, C3+     | 1.922       | 0.873    | 97.4           | 2.522   | Mn <sub>4</sub> /Os <sub>4</sub> /d <sub>6</sub>                | 30   |
| NECJAH   | Mn3.75  | 2.885        | 0.050 | M, C3+     | 1.920       | 0.873    | 97.4           | 2.519   | Mn <sub>4</sub> /Os <sub>4</sub> /d <sub>6</sub>                | 31   |
| mean     |         | 2.886        |       |            | 1.921       | 0.873    | 97.4           | 2.520   |                                                                 |      |

Table S4. Geometric parameters for manganese(IV) cubanes

| Code     | Mn-Mn (Å) | s.d.  | distortion | Mn-O (Å) | Tet.par. | Mn-O-Mn (°) | O-O (Å) | Ref.          |
|----------|-----------|-------|------------|----------|----------|-------------|---------|---------------|
| VOPRIB   | 2.859     | 0.061 | M, S4-     | 1.915    | 0.886    | 96.6        | 2.534   | <sup>32</sup> |
| ACIZUH   | 2.897     | 0.062 | M, S4-     | 1.926    | 0.870    | 97.5        | 2.522   | <sup>33</sup> |
| ACOBAY   | 2.864     | 0.061 | M, S4-     | 1.912    | 0.879    | 97.0        | 2.517   | <sup>33</sup> |
| AQACMN   | 2.860     | 0.064 | M, S4-     | 1.908    | 0.877    | 97.1        | 2.508   | <sup>34</sup> |
| AQACMN02 | 2.856     | 0.056 | M, S4-     | 1.913    | 0.886    | 96.6        | 2.530   | <sup>35</sup> |
| AQACMN03 | 2.848     | 0.056 | M, S4-     | 1.906    | 0.885    | 96.7        | 2.519   | <sup>36</sup> |
| BEDCIX   | 2.863     | 0.054 | M, S4-     | 1.915    | 0.883    | 96.8        | 2.530   | <sup>37</sup> |

|          |           |       |        |           |          |         |           |    |
|----------|-----------|-------|--------|-----------|----------|---------|-----------|----|
| DAGJEB   | 2.847     | 0.022 | L, S4- | 1.907     | 0.887    | 96.6    | 2.525     | 38 |
| DATVEA   | 2.873     | 0.081 | M, S4- | 1.914     | 0.874    | 97.3    | 2.511     | 39 |
| ESIXEJ   | 2.865     | 0.066 | M, S4- | 1.909     | 0.875    | 97.2    | 2.508     | 40 |
| FAQBUV   | 2.888     | 0.068 | M, S4- | 1.926     | 0.877    | 97.1    | 2.534     | 41 |
| FERREA   | 2.858     | 0.057 | M, S4- | 1.913     | 0.885    | 96.7    | 2.530     | 42 |
| FICSIU   | 2.862     | 0.064 | M, S4- | 1.913     | 0.882    | 96.8    | 2.525     | 43 |
| IBIHUX   | 2.883     | 0.079 | M, S4- | 1.925     | 0.878    | 97.0    | 2.531     | 44 |
| KAGLEJ   | 2.880     | 0.087 | M, S4- | 1.924     | 0.880    | 96.9    | 2.533     | 45 |
| KAGLEJ10 | 2.880     | 0.087 | M, S4- | 1.924     | 0.880    | 96.9    | 2.533     | 46 |
| KEQXEJ   | 2.870     | 0.066 | M, S4- | 1.916     | 0.879    | 97.0    | 2.524     | 47 |
| LAYCIY   | 2.866     | 0.076 | M, S4- | 1.913     | 0.878    | 97.1    | 2.515     | 48 |
| LAYCOE   | 2.872     | 0.079 | M, S4- | 1.919     | 0.881    | 96.9    | 2.529     | 48 |
| MABGAY   | 2.865     | 0.057 | M, S4- | 1.915     | 0.883    | 96.8    | 2.530     | 49 |
| MABGAY01 | 2.874     | 0.054 | M, S4- | 1.921     | 0.882    | 96.9    | 2.535     | 49 |
| MABGEC   | 2.871     | 0.052 | M, S4- | 1.919     | 0.883    | 96.8    | 2.534     | 49 |
| NEPZEN   | 2.860     | 0.063 | M, S4- | 1.913     | 0.883    | 96.8    | 2.525     | 50 |
| NORXUN   | 2.872     | 0.078 | M, S4- | 1.918     | 0.879    | 97.0    | 2.524     | 51 |
| PAKSIE   | 2.862     | 0.053 | M, S4- | 1.917     | 0.885    | 96.7    | 2.534     | 52 |
| PATZOA   | 2.870     | 0.053 | M, C3+ | 1.917     | 0.881    | 96.9    | 2.530     | 53 |
| RALWUW   | 2.864     | 0.058 | M, S4- | 2.036     | 0.882    | 96.8    | 2.527     | 54 |
| REZFIL   | 2.846     | 0.039 | M, C3+ | 2.036     | 0.888    | 96.5    | 2.528     | 55 |
| RUHSES   | 2.881     | 0.062 | M, S4- | 1.915     | 0.880    | 96.9    | 2.536     | 56 |
| RUHSIW   | 2.880     | 0.056 | M, S4- | 1.907     | 0.889    | 96.5    | 2.559     | 56 |
| SABNEP   | 2.854     | 0.044 | M, S4- | 1.924     | 0.884    | 96.7    | 2.523     | 57 |
| SISYEY   | 2.873     | 0.057 | M, S4- | 1.931     | 0.880    | 97.0    | 2.527     | 58 |
| SISYEY01 | 2.873     | 0.057 | M, S4- | 1.909     | 0.880    | 97.0    | 2.527     | 59 |
| SUWZEP   | 2.855     | 0.071 | M, S4- | 1.918     | 0.882    | 96.8    | 2.517     | 60 |
| SUWZEP01 | 2.869     | 0.082 | M, S4- | 1.918     | 0.879    | 97.0    | 2.521     | 61 |
| TIMQAH   | 2.857     | 0.062 | M, S4- | 1.909     | 0.885    | 96.7    | 2.528     | 62 |
| UDAVUQ   | 2.860     | 0.073 | M, S4- | 1.917     | 0.883    | 96.8    | 2.525     | 61 |
| UJASED   | 2.853     | 0.069 | M, S4- | 1.913     | 0.882    | 96.9    | 2.515     | 63 |
| UMETOV   | 2.866     | 0.064 | M, S4- | 1.913     | 0.879    | 97.0    | 2.520     | 64 |
| UMETUB   | 2.865     | 0.059 | M, S4- | 1.906     | 0.883    | 96.8    | 2.531     | 64 |
| VEDFUG   | 2.867     | 0.054 | M, S4- | 1.914     | 0.878    | 97.1    | 2.518     | 65 |
| VEDGAN   | 2.867     | 0.067 | M, S4- | 1.917     | 0.881    | 96.9    | 2.527     | 65 |
| VOQGAJ   | 2.882     | 0.059 | M, S4- | 1.913     | 0.871    | 97.5    | 2.511     | 66 |
| VOQGAJ   | 2.871     | 0.045 | M, S4- | 1.917     | 0.866    | 97.8    | 2.486     | 66 |
| VOQGEN   | 2.881     | 0.050 | M, S4- | 1.917     | 0.876    | 97.3    | 2.523     | 66 |
| WAQTOY   | 2.867     | 0.066 | M, S4- | 1.905     | 0.875    | 97.2    | 2.508     | 67 |
| WAQTUE   | 2.871     | 0.068 | M, S4- | 1.920     | 0.881    | 96.9    | 2.528     | 67 |
| WAQVAM   | 2.876     | 0.059 | M, S4- | 1.911     | 0.878    | 97.1    | 2.525     | 67 |
| WIMRIT   | 2.875     | 0.065 | M, S4- | 1.918     | 0.880    | 97.0    | 2.530     | 68 |
| WIMRIT11 | 2.855     | 0.082 | M      | 1.919     | 0.880    | 96.9    | 2.513     | 69 |
| WOWTEH   | 2.861     | 0.072 | M, S4- | 1.920     | 0.880    | 96.9    | 2.518     | 70 |
| WOWTIL   | 2.871     | 0.065 | M, S4- | 1.907     | 0.883    | 96.8    | 2.535     | 70 |
| XAXSAR   | 2.874     | 0.070 | M, S4- | 1.911     | 0.872    | 97.4    | 2.505     | 71 |
| XEHSOS   | 2.866     | 0.053 | M, S4- | 1.920     | 0.884    | 96.8    | 2.533     | 72 |
| XUBXOH   | 2.866     | 0.066 | M, S4- | 1.913     | 0.884    | 96.7    | 2.533     | 73 |
| mean     | 2.867(10) |       |        | 1.920(23) | 0.880(4) | 96.9(3) | 2.524(11) |    |

VOPRIB has coordination  $Mn_4/O_8/m_2d_5$ . The other compounds are all of the  $Mn_{12}$  single molecule magnet family.

Table S5. Geometric parameters for iron cubanes

| Code                | Fe-Fe (Å) | s.d.  | Distortion | Fe-O (Å) | Tet. parm | Fe-O-Fe (°) | O-O (Å) | Ligand coding                                                                                   | Ref.          |
|---------------------|-----------|-------|------------|----------|-----------|-------------|---------|-------------------------------------------------------------------------------------------------|---------------|
| CEHVER              | 3.216     | 0.041 | M, S4-     | 2.143    | 0.876     | 97.29       | 2.816   | Fe <sub>4</sub> /3s <sub>4</sub>                                                                | <sup>9</sup>  |
| EBUSAW              | 3.244     | 0.000 |            | 2.122    | 0.836     | 99.68       | 2.712   | Fe <sub>4</sub> /3s <sub>4</sub>                                                                | <sup>74</sup> |
| EBUVON              | 3.262     | 0.056 | M, S4-     | 2.152    | 0.853     | 98.61       | 2.783   | Fe <sub>4</sub> /1s <sub>2</sub> /m <sub>4</sub>                                                | <sup>75</sup> |
| EBUVUT              | 3.267     | 0.037 | M, S4-     | 2.158    | 0.857     | 98.43       | 2.798   | Fe <sub>4</sub> /1s <sub>2</sub> /m <sub>4</sub>                                                | <sup>75</sup> |
| EBUWAA              | 3.249     | 0.037 | M, S4-     | 2.144    | 0.855     | 98.55       | 2.777   | Fe <sub>4</sub> /1s <sub>2</sub> /m <sub>4</sub>                                                | <sup>75</sup> |
| EBUWII              | 3.249     | 0.095 |            | 2.145    | 0.855     | 98.48       | 2.779   | Fe <sub>4</sub> /1s <sub>2</sub> /m <sub>4</sub>                                                | <sup>75</sup> |
| EBUWII              | 3.219     | 0.118 | H, S4-     | 2.137    | 0.865     | 97.77       | 2.784   | Fe <sub>4</sub> /1s <sub>2</sub> /m <sub>4</sub>                                                | <sup>75</sup> |
| EBUWOO              | 3.222     | 0.100 | H, S4-     | 2.137    | 0.864     | 97.89       | 2.785   | Fe <sub>4</sub> /1s <sub>2</sub> /m <sub>4</sub>                                                | <sup>75</sup> |
| KASCOX <sup>a</sup> | 3.135     | 0.033 | M, S4+     | 2.117    | 0.905     | 95.53       | 2.835   | Fe <sub>4</sub> /Os <sub>4</sub> /m <sub>9</sub> b <sub>1</sub>                                 | <sup>76</sup> |
| LEFWOI              | 3.198     | 0.043 | M, S4-     | 2.126    | 0.872     | 97.50       | 2.788   | Fe <sub>4</sub> /Os <sub>4</sub> /m <sub>4</sub> b <sub>4</sub>                                 | <sup>12</sup> |
| LEFWUO              | 3.216     | 0.034 | M          | 2.129    | 0.862     | 98.13       | 2.771   | Fe <sub>4</sub> /Os <sub>4</sub> /m <sub>4</sub> b <sub>4</sub>                                 | <sup>12</sup> |
| MESDET              | 3.161     | 0.082 | M, C2      | 2.115    | 0.882     | 96.75       | 2.788   | Fe <sub>4</sub> /Os <sub>4</sub> /m <sub>4</sub> b <sub>4</sub>                                 | <sup>77</sup> |
| ODOZUC              | 3.214     | 0.138 | H          | 2.147    | 0.877     | 97.06       | 2.820   | Fe <sub>4</sub> /1s <sub>3</sub> 2s <sub>22</sub> /m <sub>3</sub> d                             | <sup>78</sup> |
| ODUBAQ              | 3.172     | 0.127 | H, S4+     | 2.132    | 0.890     | 96.21       | 2.821   | Fe <sub>4</sub> /Os <sub>2</sub> 1s <sub>2</sub> s <sub>22</sub> /m <sub>3</sub> d <sub>2</sub> | <sup>78</sup> |
| QEFKOB              | 3.236     | 0.120 | H, S4-     | 2.145    | 0.862     | 97.94       | 2.790   | Fe <sub>4</sub> /1s <sub>2</sub> /m <sub>4</sub>                                                | <sup>79</sup> |
| VUDNEN <sup>b</sup> | 3.260     | 0.142 | H          | 2.173    | 0.870     | 97.37       | 2.836   | Fe <sub>4</sub> /1s <sub>4</sub> /m <sub>6</sub>                                                | <sup>80</sup> |
| mean                | 3.22(4)   |       |            | 2.14(2)  | 0.87(2)   | 97.7(10)    | 2.79(3) |                                                                                                 |               |
| LEFXAV <sup>c</sup> | 3.152     | 0.112 | H, S4-     | 2.113    | 0.882     | 96.57       | 2.781   | Fe <sub>4</sub> /Os <sub>4</sub> /m <sub>4</sub> d <sub>4</sub>                                 | <sup>12</sup> |
| LEFXAV <sup>c</sup> | 3.150     | 0.111 | H, S4-     | 2.111    | 0.882     | 96.63       | 2.778   | Fe <sub>4</sub> /Os <sub>4</sub> /m <sub>4</sub> d <sub>4</sub>                                 | <sup>12</sup> |
|                     | 3.151     |       |            | 2.112    |           |             | 2.78    |                                                                                                 |               |
| GOYGAC              | 3.073     | 0.012 | L, C2      | 2.040    | 0.868     | 97.75       | 2.668   | Fe <sub>4</sub> /3s <sub>4</sub>                                                                | <sup>81</sup> |

Notes: <sup>a</sup> Contains one five-coordinate iron; <sup>b</sup> Contains two five-coordinate irons; <sup>c</sup> Contains one iron(III) and three iron(II)

## References

- 1 E.Horn, M.R.Snow, and P.C.Zeleny, *Aust.J.Chem.*, 1980, **33**, 1659.
- 2 S.B.Copp, K.T.Holman, J.O.S.Sangster, S.Subramanian, and M.J.Zaworotko, *J.Chem.Soc.,Dalton Trans.*, 1995, 2233.
- 3 S.B.Copp, S.Subramanian, and M.J.Zaworotko, *J.Am.Chem.Soc.*, 1992, **114**, 8719.
- 4 S.B.Copp, S.Subramanian, and M.J.Zaworotko, *Angew.Chem.,Int.Ed.*, 1993, **32**, 706.
- 5 S.B.Copp, S.Subramanian, and M.J.Zaworotko, *Chem.Commun.*, 1993, 1078.
- 6 H.Abourahma, S.B.Copp, M.-A.MacDonald, R.E.Melendez, S.D.Batchilder, and M.J.Zaworotko, *J.Chem.Cryst.*, 1995, **25**, 731.
- 7 M.D.Clerk and M.J.Zaworotko, *Chem.Commun.*, 1991, 1607.
- 8 K.T.Holman and M.J.Zaworotko, *J.Chem.Cryst.*, 1995, **25**, 93.
- 9 T.A.Hudson, K.J.Berry, B.Moubaraki, K.S.Murray, and R.Robson, *Inorg.Chem.*, 2006, **45**, 3549.
- 10 V.McKee and W.B.Shepard, *Chem.Commun.*, 1985, 158.
- 11 S.Brooker, V.McKee, W.B.Shepard, and L.K.Pannell, *J.Chem.Soc.,Dalton Trans.*, 1987, 2555.
- 12 K.L.Taft, A.Caneschi, L.E.Pence, C.D.Delfs, G.C.Papaefthymiou, and S.J.Lippard, *J.Am.Chem.Soc.*, 1993, **115**, 11753.

- 13 M.-L. Tong, H. K. Lee, S.-L. Zheng, and X.-M. Chen, *Chem.Lett.*, 1999, 1087.
- 14 M.-L. Tong, S.-L. Zheng, J.-X. Shi, Y.-X. Tong, H. K. Lee, and X.-M. Chen, *J.Chem.Soc.,Dalton Trans.*, 2002, 1727.
- 15 Y. Li, W.Wernsdorfer, R.Clerac, I.J.Hewitt, C.E.Anson, and A.K.Powell, *Inorg.Chem.*, 2006, **45**, 2376.
- 16 L.E.Pence, A.Caneschi, and S.J.Lippard, *Inorg.Chem.*, 1996, **35**, 3069.
- 17 S.Brooker, V.McKee, and T.Metcalf, *Inorg.Chim.Acta*, 1996, **246**, 171.
- 18 M.Nihe, N.Hoshino, T.Ito, and H.Oshio, *Chem.Lett.*, 2002, 1016.
- 19 G.S.Papaefstathiou, A.Escuer, F.A.Mautner, C.Raptopoulou, A.Terzis, S.P.Perlepes, and R.Vicente, *Eur.J.Inorg.Chem.*, 2005, 879.
- 20 C.J.Milios, E.Kefalloniti, C.P.Raptopoulou, A.Terzis, R.Vicente, N.Lalioti, A.Escuer, and S.P.Perlepes, *Chem.Comm.*, 2003, 819.
- 21 M.Mikuriya, Y.Hashimoto, and A.Kawamori, *Chem.Lett.*, 1995, 1095.
- 22 J.-Z. Wu, E.Sellitto, G.P.A.Yap, J.Sheats, and G.C.Dismukes, *Inorg.Chem.*, 2004, **43**, 5795.
- 23 E.K.Brechin, C.Boskovic, W.Wernsdorfer, J. Yoo, A.Yamaguchi, E.C.Sanudo, T.R.Concolino, A.L.Rheingold, H.Ishimoto, D.N.Hendrickson, and G.Christou, *J.Am.Chem.Soc.*, 2002, **124**, 9710.
- 24 G.Aromi, S.Bhaduri, P.Artus, K.Folting, and G.Christou, *Inorg.Chem.*, 2002, **41**, 805.
- 25 G.Aromi, M.W.Wemple, S.J.Aubin, K.Folting, D.N.Hendrickson, and G.Christou, *J.Am.Chem.Soc.*, 1998, **120**, 5850.
- 26 M.W.Wemple, D.M.Adams, K.Folting, D.N.Hendrickson, and G.Christou, *J.Am.Chem.Soc.*, 1995, **117**, 7275.
- 27 S. Wang, M.S.Wemple, J. Yoo, K.Folting, J.C.Huffman, K.S.Hagen, D.N.Hendrickson, and G.Christou, *Inorg.Chem.*, 2000, **39**, 1501.
- 28 W.F.Ruettinger, C.Campana, and G.C.Dismukes, *J.Am.Chem.Soc.*, 1997, **119**, 6670.
- 29 N.E.Chakov, K.A.Abboud, L.N.Zakharov, A.L.Rheingold, D.N.Hendrickson, and G.Christou, *Polyhedron*, 2003, **22**, 1759.
- 30 W.F.Ruettinger, D.M.Ho, and G.C.Dismukes, *Inorg.Chem.*, 1999, **38**, 1036.
- 31 J.-Z. Wu, F. D. Angelis, T.G.Carrell, G.P.A.Yap, J.Sheats, R.Car, and G.C.Dismukes, *Inorg.Chem.*, 2006, **45**, 189.
- 32 A.R.Schake, H.-L. Tsai, N. d. Vries, R.J.Webb, K.Folting, D.N.Hendrickson, and G.Christou, *Chem.Comm.*, 1992, 181.
- 33 T.Kuroda-Sowa, M.Lam, A.L.Rheingold, C.Frommen, W.M.Reiff, M.Nakano, J.Yoo, A.L.Maniero, L.-C.Brunel, G.Christou, and D.N.Hendrickson, *Inorg.Chem.*, 2001, **40**, 6469.
- 34 T.Lis, *Acta Crystallogr.,Sect.B:Struct.Crystallogr.Cryst.Chem.*, 1980, **36**, 2042.
- 35 A.Cornia, A.C.Fabretti, R.Sessoli, L.Sorace, D.Gatteschi, A.-L.Barra, C.Daiguebonne, and T.Roisnel, *Acta Crystallogr.,Sect.C:Cryst.Struct.Comm.*, 2002, **58**, m371.
- 36 P.Langan, R.Robinson, P.J.Brown, D.Argyriou, D.Hendrickson, and G.Christou, *Acta Crystallogr.,Sect.C:Cryst.Struct.Comm.*, 2001, **57**, 909.
- 37 M.Soler, W.Wernsdorfer, Z. Sun, J.C.Huffman, D.N.Hendrickson, and G.Christou, *Chem.Comm.*, 2003, 2672.
- 38 G.-Q. Bian, T.Kuroda-Sowa, H.Konaka, M.Hatano, M.Maekawa, M.Munakata, H.Miyasaka, and M.Yamashita, *Inorg.Chem.*, 2004, **43**, 4790.
- 39 G.-Q.Bian, T.Kuroda-Sowa, T.Nogami, K.Sugimoto, M.Maekawa, M.Munakata, H.Miyasaka, and M.Yamashita, *Bull.Chem.Soc.Jpn.*, 2005, **78**, 1032.
- 40 H. Zhao, C.P.Berlinguette, J.Bacsá, A.V.Prosvirin, J.K.Bera, S.E.Tichy, E.J.Schelter, and K.R.Dunbar, *Inorg.Chem.*, 2004, **43**, 1359.

- 41 E. Coronado, A. Forment-Aliaga, A. Gaita-Arino, C. Gimenez-Saiz, F. M. Romero, and W. Wernsdorfer, *Angew. Chem., Int. Ed.*, 2004, **43**, 6152.
- 42 G.-Q. Bian, T. Kuroda-Sowa, N. Gunjima, M. Maekawa, and M. Munakata, *Inorg. Chem. Commun.*, 2005, **8**, 208.
- 43 Chen-I. Yang, H.-L. Tsai, G.-H. Lee, C.-S. Wur, and S.-F. Yang, *Chem. Lett.*, 2005, **34**, 288.
- 44 S. Willemain, B. Donnadiou, L. Lecren, B. Henner, R. Clerac, C. Guerin, A. Meyer, A. V. Pokrovskii, and J. Larionova, *New J. Chem. (Nouv. J. Chim.)*, 2004, **28**, 919.
- 45 P. D. W. Boyd, Q. Li, J. B. Vincent, K. Folting, H.-R. Chang, W. E. Streib, J. C. Huffman, G. Christou, and D. N. Hendrickson, *J. Am. Chem. Soc.*, 1988, **110**, 8537.
- 46 R. Sessoli, H.-L. Tsai, A. R. Schake, S. Wang, J. B. Vincent, K. Folting, D. Gatteschi, G. Christou, and D. N. Hendrickson, *J. Am. Chem. Soc.*, 1993, **115**, 1804.
- 47 J. An, Z.-D. Chen, J. Bian, J.-T. Chen, S.-X. Wang, S. Gao, and G.-X. Xu, *Inorg. Chim. Acta*, 2000, **299**, 28.
- 48 H.-L. Tsai, H.-A. Shiao, T.-Y. Jwo, C.-I. Yang, C.-S. Wur, and G.-H. Lee, *Polyhedron*, 2005, **24**, 2205.
- 49 M. Soler, W. Wernsdorfer, K. A. Abboud, J. C. Huffman, E. R. Davidson, D. N. Hendrickson, and G. Christou, *J. Am. Chem. Soc.*, 2003, **125**, 3576.
- 50 M. Soler, P. Artus, K. Folting, J. C. Huffman, D. N. Hendrickson, and G. Christou, *Inorg. Chem.*, 2001, **40**, 4902.
- 51 D. Ruiz, Z. Sun, B. Albelá, K. Folting, J. Ribas, G. Christou, and D. N. Hendrickson, *Angew. Chem., Int. Ed.*, 1998, **37**, 300.
- 52 L. Zoppi, M. Mannini, M. Pacchioni, G. Chastanet, D. Bonacchi, C. Zanardi, R. Biagi, U. D. Pennino, D. Gatteschi, A. Cornia, and R. Sessoli, *Chem. Commun.*, 2005, 1640.
- 53 A. J. Tasiopoulos, W. Wernsdorfer, K. A. Abboud, and G. Christou, *Inorg. Chem.*, 2005, **44**, 6324.
- 54 P. Artus, C. Boskovic, J. Yoo, W. E. Streib, L.-C. Brunel, D. N. Hendrickson, and G. Christou, *Inorg. Chem.*, 2001, **40**, 4199.
- 55 S. M. J. Aubin, Z. Sun, H. J. Eppley, E. M. Rumberger, I. A. Guzei, K. Folting, P. K. Gantzel, A. L. Rheingold, G. Christou, and D. N. Hendrickson, *Inorg. Chem.*, 2001, **40**, 2127.
- 56 Z. Sun, S. M. J. Aubin, I. A. Guzei, A. L. Rheingold, G. Christou, and D. N. Hendrickson, *Chem. Commun.*, 1997, 2239.
- 57 T. Kuroda-Sowa, T. Handa, T. Kotera, M. Maekawa, H. Miyasaka, M. Munakata, and M. Yamashita, *Chem. Lett.*, 2004, **33**, 540.
- 58 Z. Sun, D. Ruiz, E. Rumberger, C. D. Incarvito, K. Folting, A. L. Rheingold, G. Christou, and D. N. Hendrickson, *Inorg. Chem.*, 1998, **37**, 4758.
- 59 Z. Sun, D. Ruiz, N. R. Dilley, M. Soler, J. Ribas, K. Folting, M. B. Maple, G. Christou, and D. N. Hendrickson, *Chem. Commun.*, 1999, 1973.
- 60 H.-L. Tsai, D.-M. Chen, C.-I. Yang, T.-Y. Jwo, C.-S. Wur, G.-H. Lee, and Y. Wang, *Inorg. Chem. Commun.*, 2001, **4**, 511.
- 61 J. An, Z.-D. Chen, X.-X. Zhang, H. G. Raubenheimer, C. Esterhuysen, S. Gao, and G.-X. Xu, *J. Chem. Soc., Dalton Trans.*, 2001, 3352.
- 62 J.-Y. Li, H. Xu, J.-Z. Zou, Z. Xu, X.-Z. You, and K.-P. Yu, *Polyhedron*, 1996, **15**, 3325.
- 63 N. E. Chakov, W. Wernsdorfer, K. A. Abboud, D. N. Hendrickson, and G. Christou, *Dalton Trans.*, 2003, 2243.
- 64 C.-D. Park, S. W. Rhee, Y. Kim, W. Jeon, D.-Y. Jung, D.-h. Kim, Y. Do, and H.-C. Ri, *Bull. Korean Chem. Soc.*, 2001, **22**, 453.
- 65 J. M. Lim, Y. Do, and J. Kim, *Eur. J. Inorg. Chem.*, 2006, 711.



- 66 C.Boskovic, M.Pink, J.C.Huffman, D.N.Hendrickson, and G.Christou, *J.Am.Chem.Soc.*, 2001, **123**, 9914.
- 67 N.E.Chakov, M.Soler, W.Wernsdorfer, K.A.Abboud, and G.Christou, *Inorg.Chem.*, 2005, **44**, 5304.
- 68 H.-L. Tsai, H.J.Eppley, N. d. Vries, K.Folting, G.Christou, and D.N.Hendrickson, *Chem.Commun.*, 1994, 1745.
- 69 H.J.Eppley, H.-L. Tsai, N. d. Vries, K.Folting, G.Christou, and D.N.Hendrickson, *J.Am.Chem.Soc.*, 1995, **117**, 301.
- 70 H.-L. Tsai, T.-Y. Jwo, G.-H. Lee, and Y. Wang, *Chem.Lett.*, 2000, 346.
- 71 P.King, W.Wernsdorfer, K.A.Abboud, and G.Christou, *Inorg.Chem.*, 2005, **44**, 8659.
- 72 M.Soler, S.K.Chandra, D.Ruiz, E.R.Davidson, D.N.Hendrickson, and G.Christou, *Chem.Commun.*, 2000, 2417.
- 73 T.Kuroda-Sowa, S.Fukuda, S.Miyoshi, M.Maekawa, M.Munakata, H.Miyasaka, and M.Yamashita, *Chem.Lett.*, 2002, 682.
- 74 B.F.Abrahams, T.A.Hudson, and R.Robson, *J.Am.Chem.Soc.*, 2004, **126**, 8624.
- 75 H.Oshio, N.Hoshino, T.Ito, and M.Nakano, *J.Am.Chem.Soc.*, 2004, **126**, 8805.
- 76 S. Yoon and S.J.Lippard, *J.Am.Chem.Soc.*, 2005, **127**, 8386.
- 77 D. Lee, L.Sorace, A.Caneschi, and S.J.Lippard, *Inorg.Chem.*, 2001, **40**, 6774.
- 78 J.M.Clemente-Juan, C.Mackiewicz, M.Verelst, F.Dahan, A.Bousseksou, Y.Sanakis, and J.-P.Tuchagues, *Inorg.Chem.*, 2002, **41**, 1478.
- 79 H.Oshio, N.Hoshino, and T.Ito, *J.Am.Chem.Soc.*, 2000, **122**, 12602.
- 80 S.C.Shoner and P.P.Power, *Inorg.Chem.*, 1992, **31**, 1001.
- 81 R.G.Raptis, I.P.Georgakaki, and D.C.R.Hockless, *Angew.Chem.,Int.Ed.*, 1999, **38**, 1632.
